# Supplementary material
Source: HighWire-hosted journal article supplement (https://erj.ersjournals.com/content/51/4/1702536)
Supplement: inline-supplementary-material-1 [file inline-supplementary-material-1.pdf]

**Associations between blood eosinophils and decline in lung function adults with and without asthma**

**Robert J. Hancox, Ian D Pavord, Malcolm R. Sears.**

**Online data supplement**

**Online Table S1. Characteristics of participants and comparison of those with and without missing blood counts**

|                                                 | <b>Complete data</b> | <b>Missing</b> | <b>p</b> |
|-------------------------------------------------|----------------------|----------------|----------|
| Male sex (n/N)                                  | 366/691 (53%)        | 151/316 (48%)  | 0.127    |
| Smoker at 38 years (n/N)                        | 162/685 (24%)        | 90/263 (34%)   | 0.001    |
| Median pack-years smoking by age 38 (n=423)*    | 12.2                 | 14.6           | 0.009    |
| Asthma at 38 years (n/N)                        | 118/685 (17%)        | 41/254 (16%)   | 0.694    |
| Wheeze at age 38 years (n/N)                    | 177/685 (26%)        | 70/254 (28%)   | 0.595    |
| Atopy at 21 or 32 years (n/N)                   | 479/684 (70%)        | 179/268 (67%)  | 0.331    |
|                                                 |                      |                |          |
| Pre-bronchodilator spirometry at age 38 years:  |                      |                |          |
| n                                               | 681                  | 246            |          |
| FEV <sub>1</sub> (% predicted)                  | 97.9%                | 96.0           | 0.044    |
| FEV <sub>1</sub> /FVC ratio (%)                 | 76.7%                | 76.0%          | 0.179    |
|                                                 |                      |                |          |
| Post-bronchodilator spirometry at age 38 years: |                      |                |          |
| n                                               | 677                  | 233            |          |
| FEV <sub>1</sub> (% predicted)                  | 102.2%               | 99.5%          | 0.003    |
| FEV <sub>1</sub> /FVC ratio (%)                 | 80.3%                | 79.8%          | 0.346    |

Participants with complete data had eosinophil counts measured at ages 21, 26, 32, and 38 years. Pregnant women and participants who had deceased by age 38 are excluded. \*Excludes never smokers. P values are from chi-squared tests, t-tests, or Wilcoxon rank-sum tests.

**Online Table S2. Correlations between ages for participants with and without adult asthma**

**a) No adult asthma**

| Age | Eosinophil counts at each age |                |            |  | Spearman correlations between ages (rho) |       |       |
|-----|-------------------------------|----------------|------------|--|------------------------------------------|-------|-------|
|     | n                             | Geometric Mean | 95% CI     |  | 21                                       | 26    | 32    |
| 21  | 546                           | 0.18           | 0.17, 0.19 |  |                                          |       |       |
| 26  | 608                           | 0.16           | 0.16, 0.17 |  | 0.520                                    |       |       |
| 32  | 622                           | 0.18           | 0.17, 0.19 |  | 0.492                                    | 0.634 |       |
| 38  | 649                           | 0.18           | 0.17, 0.19 |  | 0.477                                    | 0.524 | 0.617 |

**a) Asthma reported between ages 21 and 38**

| Age | Eosinophil counts at each age |                |            |  | Spearman correlations between ages (rho) |       |       |
|-----|-------------------------------|----------------|------------|--|------------------------------------------|-------|-------|
|     | n                             | Geometric Mean | 95% CI     |  | 21                                       | 26    | 32    |
| 21  | 227                           | 0.28           | 0.26, 0.30 |  |                                          |       |       |
| 26  | 241                           | 0.25           | 0.23, 0.28 |  | 0.591                                    |       |       |
| 32  | 244                           | 0.24           | 0.22, 0.26 |  | 0.553                                    | 0.657 |       |
| 38  | 249                           | 0.24           | 0.22, 0.26 |  | 0.406                                    | 0.510 | 0.669 |

Excludes pregnant women. Correlations between ages are all statistically significant (all p values <0.0001)

**Online Table S3. Predictors of percent blood eosinophil counts**

|                            | Coeff | 95% CI        | P      |
|----------------------------|-------|---------------|--------|
| Male Sex                   | 0.052 | 0.005, 0.099  | 0.029  |
| Age (years)                | 0.001 | -0.001, 0.003 | 0.358  |
| Current Smoker             | 0.026 | -0.012, 0.064 | 0.186  |
| Atopic sensitisation       | 0.094 | 0.101, 0.146  | <0.001 |
| Adult asthma (21 to 38)    | 0.168 | 0.101, 0.235  | <0.001 |
| Childhood asthma (9 to 13) | 0.082 | 0.001, 0.141  | 0.024  |
| Inhaled corticosteroid use | 0.081 | 0.013, 0.143  | 0.020  |

Analyses by a random effects linear regression model using 2888 observations from 815 individuals. Coefficients represent the difference in log-percent eosinophil counts associated with each independent predictor.
